# Supplementary material for: Exploration of Alternative Splicing Events in Mesenchymal Stem Cells from Human Induced Pluripotent Stem Cells
Source: MDPI journal article supplement (doi:10.3390/genes12050737), 2021-05-13

## **Supplementary Materials**

### **Exploration of alternative splicing events in mesenchymal stem cells from human induced pluripotent stem cells**

Ji Eun Jeong<sup>1</sup>, Binna Seol<sup>1</sup>, Han-Seop Kim<sup>1</sup>, Jae Yun Kim<sup>1,2</sup>, and Yee Sook Cho<sup>1,2,\*</sup>

<sup>1</sup>Stem Cell Research Laboratory, Immunotherapy Research Center, Korea Research Institute of Bioscience and Biotechnology, 125 Gwahak-ro, Yuseong-gu, Daejeon, 34141, South Korea;

<sup>2</sup>Department of Bioscience, KRIBB School, University of Science & Technology, 113 Gwahak-ro, Yuseong-gu, Daejeon 34113, South Korea

\*Correspondence: Yee Sook Cho, Ph.D., Stem Cell Research Laboratory, Immunotherapy Research Center, Korea Research Institute of Bioscience and Biotechnology, 125 Gwahak-ro, Yuseong-gu, Daejeon 34141, South Korea, Tel: 82-42-860-4479, Fax: 82-42-860-4608, E-mail: [june@kribb.re.kr](mailto:june@kribb.re.kr)

## **Supplemental Information**

**Supplemental information includes: Supplementary Figures S1-S3, Figure legends for figures S1-S3, Supplementary Tables S1-S8, and Table legends for Tables S1-S8.**

**Supplementary Figure S1.** Characterization of cell surface markers on iMSCs and UCB-MSCs. Flow cytometric analysis of positive MSC markers (CD73, CD105, and CD90) and negative markers (CD34 and CD45) was performed in monolayer-cultured iMSCs and UCB-MSCs. The data are means  $\pm$  SDs of three independent experiments.

**Supplementary Figure S2.** The top five KEGG pathways of upregulated and downregulated DEGs. KEGG pathway analysis was performed by using DAVID. The x-axis indicates the enrichment scores [ $-\log_{10}$  (p value), p-value cut-off of 0.05] for each KEGG pathway term. The y-axis shows detailed classification of the KEGG pathway terms.

**Supplementary Figure S3.** Sashimi plots of the RNA-seq data for the three types of AS events (A5SS, A3SS, and MXE) that were differentially presented in iMSCs and UCB-MSCs. The sashimi plot was constructed with the MISO package. The vertical axis on the left side of the main panel shows the counts of RNA-Seq reads spanning the junctions in each region. The genomic coordinates for individual splice sites are shown at the top, and the schematic of each splicing event is shown at the bottom. Red indicates iMSCs (C\_MSC-1), and orange indicates UCB-MSCs (C\_MSC-3). A5SS, alternative 5' splice site; A3SS, alternative 3' splice site; MXE, mutually exclusive exon.

**Supplementary Table S1.** Top 30 upregulated DEGs (iMSCs vs UCB-MSCs).

**Supplementary Table S2.** Top 30 downregulated DEGs (iMSCs vs UCB-MSCs).

**Supplementary Table S3.** Upregulated and downregulated DSGs with each AS type (iMSCs

vs UCB-MSCs). A5SS, alternative 5' splice site; A3SS, alternative 3' splice site; MXE, mutually exclusive exon; RI, retained intron.

**Supplementary Table S4.** GO annotated DSGs with each AS type, analyzed by DAVID. CC, cellular component; BP, biological process; MF, molecular function.

**Supplementary Table S5.** KEGG (A) and Reactome pathway analysis (B) of DSGs using GSEA.

**Supplementary Table S6.** Antibody list for FACS analysis.

**Supplementary Table S7.** PCR primer list for PCR validation.

**Supplementary Table S8.** GO annotated DEGs with each AS type, analyzed by DAVID. CC, cellular component; BP, biological process; MF, molecular function.

**Supplementary Table S1.** Top 30 up-regulated DEGs (iMSCs vs UCB-MSCs).

| Genes               | Description                                                      | Fold change    | Normalized RC (log2) |             |
|---------------------|------------------------------------------------------------------|----------------|----------------------|-------------|
|                     |                                                                  | iMSCs/UCB-MSCs | iMSCs                | UCB-MSCs    |
| <i>PAX8</i>         | Paired box 8                                                     | 1162.788439    | 2431.126             | 2.090772713 |
| <i>LOC102724034</i> | Uncharacterized LOC102724034                                     | 909.7359569    | 11493.04             | 12.63338224 |
| <i>ADAMTS7P1</i>    | ADAMTS7 pseudogene 1                                             | 476.4683437    | 91912.08             | 192.9027987 |
| <i>UBE2Q2P2</i>     | Ubiquitin conjugating enzyme E2 Q2 pseudogene 2                  | 309.2364762    | 19229.02             | 62.1822453  |
| <i>LICAM</i>        | L1 cell adhesion molecule                                        | 300.8134985    | 946.0126             | 3.144847651 |
| <i>KRT19</i>        | Keratin 19                                                       | 274.8743749    | 9847.881             | 35.82684136 |
| <i>NDN</i>          | Necdin, MAGE family member                                       | 264.6554755    | 553.4132             | 2.091070253 |
| <i>FOXL2</i>        | Forkhead box L2                                                  | 260.6615362    | 545.159              | 2.091444068 |
| <i>CLDN1</i>        | Claudin 1                                                        | 241.4819778    | 1523.421             | 6.308631114 |
| <i>GOLGA6L10</i>    | Golgin A6 family-like 10                                         | 200.3113348    | 37796.23             | 188.6874069 |
| <i>SYNDIG1</i>      | Synapse differentiation inducing 1                               | 195.4200298    | 408.736              | 2.091576958 |
| <i>SPP1</i>         | Secreted phosphoprotein 1                                        | 194.4936593    | 611.9382             | 3.146314233 |
| <i>DSC3</i>         | Desmocollin 3                                                    | 179.4317136    | 2645.516             | 14.7438575  |
| <i>GOLGA6L17P</i>   | Golgin A6 family-like 17, pseudogene                             | 176.7234659    | 15460.51             | 87.48417121 |
| <i>PDGFB</i>        | Platelet derived growth factor subunit B                         | 167.5398937    | 350.4458             | 2.091715453 |
| <i>IGFN1</i>        | Immunoglobulin-like and fibronectin type III domain containing 1 | 150.5769441    | 632.6439             | 4.201465815 |
| <i>CPXMI</i>        | Carboxypeptidase X (M14 family), member 1                        | 137.094866     | 286.7377             | 2.091527863 |
| <i>GALNT14</i>      | Polypeptide N-acetylgalactosaminyltransferase 14                 | 133.9763653    | 421.6135             | 3.146924196 |
| <i>CNIH3</i>        | Cornichon family AMPA receptor auxiliary protein 3               | 132.5495956    | 417.0128             | 3.146088858 |
| <i>PPP1R14A</i>     | Protein phosphatase 1 regulatory inhibitor subunit 14A           | 127.855137     | 1480.783             | 11.58172632 |
| <i>TBX1</i>         | T-box 1                                                          | 127.0366961    | 533.5866             | 4.200255369 |
| <i>FHOD3</i>        | Formin homology 2 domain containing 3                            | 126.8895917    | 1469.575             | 11.58152673 |
| <i>GOLGA6L9</i>     | Golgin A6 family-like 9                                          | 117.3798539    | 35017.43             | 298.3257075 |
| <i>CELSR1</i>       | Cadherin EGF LAG seven-pass G-type receptor 1                    | 115.8810893    | 975.6179             | 8.419129724 |
| <i>CDCP1</i>        | CUB domain containing protein 1                                  | 115.5766919    | 6455.961             | 55.85867464 |
| <i>RRAD</i>         | Ras-related associated with diabetes                             | 103.9473972    | 327.108              | 3.146860571 |
| <i>NCAM2</i>        | Neural cell adhesion molecule 2                                  | 102.0849736    | 1397.634             | 13.69089181 |
| <i>OXTR</i>         | Oxytocin receptor                                                | 96.22165781    | 1824.4               | 18.96039185 |
| <i>LYPD1</i>        | LY6/PLAUR domain containing 1                                    | 95.58487721    | 5137.762             | 53.75077969 |
| <i>LOC727751</i>    | Golgin A2 pseudogene                                             | 89.91300922    | 46728.6              | 519.7090372 |

**Supplementary Table S2.** To 30 down-regulated DEGs (iMSCs vs UCB-MSCs).

| Genes            | Description                                                    | Fold change    | Normalized RC (log2) |          |
|------------------|----------------------------------------------------------------|----------------|----------------------|----------|
|                  |                                                                | iMSCs/UCB-MSCs | iMSCs                | UCB-MSCs |
| <i>POSTN</i>     | Periostin                                                      | 0.000471       | 88.38359             | 187753.3 |
| <i>MEG3</i>      | Maternally expressed 3 (non-protein coding)                    | 0.000626       | 1.761836             | 2816.614 |
| <i>SULF1</i>     | Sulfatase 1                                                    | 0.000884       | 12.05229             | 13629.58 |
| <i>ADAMTS2</i>   | ADAM metalloproteinase with thrombospondin type 1 motif 2      | 0.000942       | 7.763983             | 8240.488 |
| <i>FAP</i>       | Fibroblast activation protein alpha                            | 0.000951       | 6.049402             | 6360.943 |
| <i>BGN</i>       | Biglycan                                                       | 0.001135       | 25.77467             | 22703.18 |
| <i>OLFM2</i>     | Olfactomedin 2                                                 | 0.00127        | 7.76366              | 6112.082 |
| <i>COL1A2</i>    | Collagen type I alpha 2                                        | 0.001353       | 373.979              | 276400.2 |
| <i>GALNT5</i>    | Polypeptide N-acetylgalactosaminyltransferase 5                | 0.001415       | 7.763323             | 5487.979 |
| <i>COL5A3</i>    | Collagen type V alpha 3                                        | 0.00142        | 15.48205             | 10906.59 |
| <i>ELN</i>       | Elastin                                                        | 0.002099       | 5.18955              | 2472.944 |
| <i>SIX2</i>      | SIX homeobox 2                                                 | 0.00233        | 3.474457             | 1491.481 |
| <i>NUPR1</i>     | Nuclear protein 1, transcriptional regulator                   | 0.002564       | 10.33443             | 4030.008 |
| <i>LMO2</i>      | LIM domain only 2                                              | 0.002656       | 2.617027             | 985.4647 |
| <i>NPR3</i>      | Natriuretic peptide receptor 3                                 | 0.002788       | 9.476547             | 3398.54  |
| <i>LINC01133</i> | Long intergenic non-protein coding RNA 1133                    | 0.003018       | 5.188487             | 1719.19  |
| <i>HEY2</i>      | Hes related family bhlh transcription factor with YRPW motif 2 | 0.003128       | 1.760299             | 562.7336 |
| <i>MGP</i>       | Matrix Gla protein                                             | 0.003221       | 5.188425             | 1610.62  |
| <i>ZNF423</i>    | Zinc finger protein 423                                        | 0.003645       | 3.473362             | 952.7971 |
| <i>COL3A1</i>    | Collagen type III alpha 1                                      | 0.004034       | 703.3112             | 174337.5 |
| <i>ITGBL1</i>    | Integrin subunit beta like 1                                   | 0.004251       | 40.34947             | 9490.773 |
| <i>CXCL12</i>    | C-X-C motif chemokine ligand 12                                | 0.004399       | 13.76451             | 3128.754 |
| <i>ITGA8</i>     | Integrin subunit alpha 8                                       | 0.004591       | 2.61821              | 570.2804 |
| <i>CRLF1</i>     | Cytokine receptor like factor 1                                | 0.005155       | 1.759524             | 341.3509 |
| <i>ABCA6</i>     | ATP binding cassette subfamily A member 6                      | 0.005405       | 1.759448             | 325.5381 |
| <i>IGFBP1</i>    | Insulin like growth factor binding protein 1                   | 0.005732       | 18.90693             | 3298.385 |
| <i>ABCA8</i>     | ATP binding cassette subfamily A member 8                      | 0.005773       | 8.615749             | 1492.537 |
| <i>CD248</i>     | CD248 molecule                                                 | 0.005824       | 19.76897             | 3394.479 |
| <i>RRAGB</i>     | Ras related GTP binding B                                      | 0.006351       | 1.760303             | 277.1727 |
| <i>FLJ32255</i>  | Uncharacterized LOC643977                                      | 0.006475       | 1.76078              | 271.9357 |

**Supplementary Table S3.** Upregulated and downregulated DSGs with each AS type (iMSCs vs UCB-MSCs). A5SS, alternative 5' splice site; A3SS, alternative 3' splice site; MXE, mutually exclusive exon; RI, retained intron.

| AS types | Upregulated genes                                                                                                                                                                                                                                                                                                                 | Downregulated genes                                                                                                                                                                                          |
|----------|-----------------------------------------------------------------------------------------------------------------------------------------------------------------------------------------------------------------------------------------------------------------------------------------------------------------------------------|--------------------------------------------------------------------------------------------------------------------------------------------------------------------------------------------------------------|
| SE       | <i>ACTB, BCAR1, BCS1L, BCS1L, BCS1L, CHN1, CNN2, CNN2, DBN1, EXOSC3, FAM171A1, FAT1, INO80E, LINC00623, LINC00623, LRR1, MGLL, MYL6, NASP, NPIP3, NPIP5, OR2A1-AS1, OR2A1-AS1, PALM, PFKFB3, PIN4, PIN4, PLEKHO1, PPAPDC1A, S100A13, SLC29A1, STYXL1, TAGLN, TIPIN, TRPT1, TRPT1, TRPT1, TUBA1A, TUBA1B, WNT5B, YIF1B, ZNHIT1</i> | <i>ABCC1, AFF3, BEST1, CALU, CALU, CALU, CCNI, CD164, CD164, CD164, CD46, EXTL2, EXTL2, FHL1, GSTM1, KIAA1462, LAMP2, LINC01123, LRRC32, MYCT1, NAB1, NAB1, NRPI, PXDN, SLC4A7, SUSU5, TFPI, TFPI, USP33</i> |
| A5SS     | <i>C7orf50, GUK1, INO80E, ITPA, MRPL52, NDUFS5, RPL23AP7, TAGLN, TRPT1, TUBA1A, YIF1B, YIF1B, ZNHIT1</i>                                                                                                                                                                                                                          | <i>CCDC80, COL5A1, CTSL, CTSL, CTSL, CTSL, CTSL, DAG1, FKBP10, GREM1, MYNN, SPIN2B</i>                                                                                                                       |
| A3SS     | <i>ADAM19, AP1G2, EMC9, EMC9, FBLIM1, PDLIM7, PRNP, S100A13, S100A13, SNRBP, TRPT1</i>                                                                                                                                                                                                                                            | <i>CD164, COL12A1, COL5A1, COL6A2, LARP4, LTBP1, NR3C1, RGS4, TOR1AIP1, ZFP91</i>                                                                                                                            |
| MXE      | <i>GUK1, RPS3, TCF3, TPM2, TUBA1A</i>                                                                                                                                                                                                                                                                                             | <i>APLP2, CALU, COL5A1, GNPDA2, IRAK1, IRAK1, ITGB5, PLAGL1, WASF3, ZBTB38</i>                                                                                                                               |
| RI       | <i>AEN, AP1G2, AP1G2, AP1G2, ATP1F1, BEND7, CMTM4, GAS2L1, GUK1, GUK1, HCFC1R1, INO80E, MOK, MRPL52, S100A13, SPHK1</i>                                                                                                                                                                                                           | <i>CCDC80, CD164, CEP350, GREM1, GREM1, MXRA8, NPTX1, P3H1, P3H1, P3H1, PDLIM5, PKD2, SEPT10, TGFBI, TGFBI, TNS3</i>                                                                                         |

**Supplementary Table S4.** GO annotated DSGs with each AS type analyzed by DAVID. CC, cellular component; BP, biological process; MF, molecular function.

| GO category |                                                             | AS types                                                                                                                                                                                                                                                              |                                                                              |                                                                                                                              |                                                                                            |                                                                                                                                                       |
|-------------|-------------------------------------------------------------|-----------------------------------------------------------------------------------------------------------------------------------------------------------------------------------------------------------------------------------------------------------------------|------------------------------------------------------------------------------|------------------------------------------------------------------------------------------------------------------------------|--------------------------------------------------------------------------------------------|-------------------------------------------------------------------------------------------------------------------------------------------------------|
|             |                                                             | SE                                                                                                                                                                                                                                                                    | A5SS                                                                         | A3SS                                                                                                                         | MXE                                                                                        | RI                                                                                                                                                    |
| CC          | Nucleolus                                                   | <i>ABHD14B, ACIN1, BCAR1, CTSB, DAXX, DEDD2, ENCI, EXOSC3, HJURP, HNRNPR, HSPA8, INO80E, MDM2, MORF4L2, PIN4, PRMT2, RBM4, RBM4B, RPA1, RPS3A, RREB1, STK35, TFIP11, TRA2A, ZNF146, ZPR1</i>                                                                          | <i>ADARBI, INO80E, NSUN5P1, RPS14, RPS2, SNAPC5, SNRPB2</i>                  | <i>CDV3, CIRBP, ILF3, MKNK2, NOL8, PHTF1, RFC1, RPS2, SRP19, SRSF5, TRA2A, ZCCHC11</i>                                       | <i>CTSB, EEF1D, EEF1D, MDM2, RPS2, RPS3</i>                                                | <i>ACADVL, ADARBI, ADARBI, AEN, BRWD1, DDX17, DDX24, DDX5, GNL3, HLT, INO80E, MED1, NOL12, NSUN5P2, PHF6, RBM3, RPL10A, RPS2, SRSF5, TRA2A, WDR46</i> |
|             | Focal adhesion                                              | <i>ACTB, ACTN1, BCAR1, CD151, CD46, CNN2, DNM2, FAT1, FHL1, HNRNPK, HSPA8, NRP1, PCBP2, PLEC, RPS3A, RSU1, USP33</i>                                                                                                                                                  | <i>CD151, CTTN, DAG1, FLII, RPL6, RPS14, RPS16, RPS2</i>                     | <i>CD44, FBLIM1, GIT2, PDLIM7, RPS2</i>                                                                                      | <i>ACTN1, DCAF6, ITGB5, P4HB, RPLP0, RPS2, RPS3</i>                                        | <i>RND3, RPL10A, RPS2, TNS3</i>                                                                                                                       |
| BP          | SRP-dependent cotranslational protein targeting to membrane | <i>RPS24, RPS3A, SEC61A1</i>                                                                                                                                                                                                                                          | <i>RPL6, RPS14, RPS16, RPS2</i>                                              | <i>RPS2, RPS2, SRP19</i>                                                                                                     | <i>RPLP0, RPS2, RPS2, RPS20, RPS3, SRP9</i>                                                | <i>RPL10A, RPL10A, RPL13, RPS2</i>                                                                                                                    |
|             | RNA splicing                                                | <i>ACIN1, HNRNPC, MTERF4, RBM4, RBM4B, SNRNP70, SON, SRSF4, TFIP11, ZNF638, ZPR1</i>                                                                                                                                                                                  | <i>HNRNPH3, TARDBP</i>                                                       | <i>DDX39B, PTBP3, QKI, SNRPB</i>                                                                                             | <i>HNRNPC,</i>                                                                             | <i>DDX39B, PPP1R8, SON</i>                                                                                                                            |
| MF          | poly(A) RNA binding                                         | <i>ACIN1, ALG13, ATP5C1, CAST, DHX30, GIGYF2, HNRNPAB, HNRNPC, HNRNPH1, HNRNPK, HNRNPR, HSP90AA1, HSPA8, LT44H, MRPL32, NDUFV3, PCBP2, PIN4, PLEC, R3HDM2, R3HDM2, RBM4, RBM4B, RPS24, RPS3A, SLC3A2, SNRNP70, SON, SRSF4, TRA2A, YTHDF1, YTHDF3, ZFP36L1, ZNF638</i> | <i>ADARBI, C7orf50, DSP, HNRNPH3, RPL6, RPS14, RPS16, RPS2, TARDBP, WDR6</i> | <i>CDK13, CIRBP, DDX39B, ILF3, LARP4, NOL8, PTBP3, QKI, R3HDM2, RBM26, RPS2, SERBP1, SNRPB, SRP19, SRSF5, TRA2A, ZCCHC11</i> | <i>CLNS1A, CSDE1, EIF4A1, HNRNPC, MTHFSD, P4HB, R3HDM2, RBMX, RPLP0, RPS2, RPS20, RPS3</i> | <i>ADARBI, DDX17, DDX24, DDX39B, DDX5, GNL3, HLT, HNRNPH1, KMT2C, NAP1L1, NOL12, PHF6, RBM3, RPL10A, RPL13, RPS2, SON, SRRM2, SRSF5, TRA2A, WDR46</i> |
|             | RNA binding                                                 | <i>EXOSC3, FARSF, HNRNPAB, HNRNPC, HNRNPH1, HNRNPK, HNRNPR, PCBP2, RBM4, RPS3A, SNRNP70, SON, YTHDF3, ZNF638</i>                                                                                                                                                      | <i>ADARBI, HNRNPH3, NSUN5P1, RPL6, RPS14, RPS16, RPS2, TARDBP</i>            | <i>CIRBP, ILF3, KIAA0907, NR3C1, PRKCSH, PTBP3, QKI, RBM26, RPS2, SNRPB, SRSF5</i>                                           | <i>HNRNPC, PSMA6, RBMX, RPS2, RPS20, RPS3, SRP9</i>                                        | <i>ADARBI, DDX17, HNRNPH1, NSUN5P2, PPP1R8, RBM3, RPL10A, RPL13, RPS2, SON, SRSF5,</i>                                                                |

**Supplementary Table S5.** KEGG (A) and Reactome pathway analysis (B) of DSGs using GSEA.

A. KEGG pathway

| Gene Set Name                                   | p-value               | FDR q-value           |
|-------------------------------------------------|-----------------------|-----------------------|
| Spliceosome                                     | $1.01 \times 10^{-9}$ | $1.89 \times 10^{-7}$ |
| Ribosome                                        | $2.95 \times 10^{-8}$ | $2.75 \times 10^{-6}$ |
| Lysosome                                        | $4.17 \times 10^{-3}$ | $1.94 \times 10^{-3}$ |
| Focal adhesion                                  | $5.45 \times 10^{-3}$ | $2.03 \times 10^{-3}$ |
| Tight junction                                  | $8.58 \times 10^{-3}$ | $2.66 \times 10^{-3}$ |
| Protein export                                  | $1.04 \times 10^{-4}$ | $2.77 \times 10^{-3}$ |
| Endocytosis                                     | $1.39 \times 10^{-4}$ | $3 \times 10^{-3}$    |
| Arrhythmogenic right ventricular cardiomyopathy | $1.45 \times 10^{-4}$ | $3 \times 10^{-3}$    |
| ECM receptor interaction                        | $2.51 \times 10^{-4}$ | $4.68 \times 10^{-3}$ |

B. Reactome pathway

| Gene Set Name                                               | P-value  | FDR q-value |
|-------------------------------------------------------------|----------|-------------|
| Metabolism of RNA                                           | 5.82E-17 | 8.92E-14    |
| Nervous system development                                  | 2.77E-13 | 2.12E-10    |
| Post-translational protein modification                     | 5.05E-13 | 2.58E-10    |
| Translation                                                 | 3.48E-12 | 1.33E-09    |
| SRP-dependent cotranslational protein targeting to membrane | 4.26E-11 | 1.3E-08     |
| Extracellular matrix organization                           | 2.2E-10  | 5.61E-08    |
| Developmental biology                                       | 5.69E-10 | 1.25E-07    |
| Eukaryotic translation elongation                           | 5.97E-09 | 1.14E-06    |
| Processing of capped intron containing premRNA              | 7.32E-09 | 1.25E-06    |



**Supplementary Table S6.** Antibody list for FACS analysis.

| Protein                        | Company (Cat. No.)            | Dilution |
|--------------------------------|-------------------------------|----------|
| CD73-PE                        | Miltenyl Biotec (130-095-182) | 1 : 11   |
| CD105-PE                       | Miltenyl Biotec (130-112-321) | 1 : 11   |
| CD90-PE                        | Miltenyl Biotec (130-114-860) | 1 : 11   |
| CD34/CD45 Cocktail, FITC, PE   | Thermo Fisher (MA1-12221)     | 1 : 11   |
| FITC Mouse IgG2a, Isotype Ctrl | BioLegend (400210)            | 1 : 200  |
| PE Mouse IgG1 isotype control  | Miltenyl Biotec (130-113-200) | 1 : 50   |

**Supplementary Table S7.** PCR primer list for PCR validation.

| Gene name              | 5'-3' sequence |                        | length      |
|------------------------|----------------|------------------------|-------------|
| <b><i>TRPT1</i> SE</b> | LEFT PRIMER    | CATGCGGTCCCATTGTGAAA   | 127bp/238bp |
|                        | RIGHT PRIMER   | TTCTCTGGAGCTGTGCTTGG   |             |
| <b><i>CNN2</i>_SE</b>  | LEFT PRIMER    | CCTGTCCAAC TTCATCAAGGC | 222bp/338bp |
|                        | RIGHT PRIMER   | CCATCTGGAGGCTGATGGTC   |             |
| <b><i>APIG2</i>_RI</b> | LEFT PRIMER    | GACTGCAGTGCACATGATCC   | 313bp/142bp |
|                        | RIGHT PRIMER   | AGGGCTTCGTTTCGCAGAG    |             |
| <b>GAPDH</b>           | LEFT PRIMER    | GAAGGTGAAGGTCGGAGTC    | 226bp       |
|                        | RIGHT PRIMER   | GAAGATGGTGATGGGATTTC   |             |

**Supplementary Table S8.** GO annotated DEGs with each AS type analyzed by DAVID. CC, cellular component; BP, biological process; MF, molecular function

| GO category |                                   | AS types                                                      |                             |                                       |                      |                           |
|-------------|-----------------------------------|---------------------------------------------------------------|-----------------------------|---------------------------------------|----------------------|---------------------------|
|             |                                   | SE                                                            | A5SS                        | A3SS                                  | MXE                  | RI                        |
| CC          | Focal adhesion                    | <i>ACTB, BCAR1, CD46, CNN2, FAT1, FHL1, NRP1, USP33</i>       | <i>DAG1</i>                 | <i>FBLIM1, PDLIM7</i>                 | <i>ITGB5, RPS3</i>   | <i>TNS3</i>               |
|             | Extracellular exosome             | <i>ACTB, CNN2, EXTL2, FAM171A1, FAT1, LAMP2, PIN4, TUBA1B</i> | <i>CTSL</i>                 | <i>COL12A1, PRNP, SNRPB</i>           | <i>ITGB5</i>         | <i>BEND7, PKD2, TGFB1</i> |
| BP          | Extracellular matrix organization | <i>PXDN</i>                                                   | <i>CCDC80, COL5A1, DAG1</i> | <i>COL5A1, COL6A2</i>                 | <i>COL5A1, ITGB5</i> | <i>CCDC80, TGFB1</i>      |
|             | Cell adhesion                     | <i>BCAR1, CD164, FAT1, KIAA1462, SUSD5</i>                    | <i>COL5A1</i>               | <i>CD164, COL12A1, COL5A1, COL6A2</i> | <i>COL5A1, ITGB5</i> | <i>CD164, TGFB1</i>       |
| MF          | Actin binding                     | <i>CNN2, DBN1, TAGLN</i>                                      | <i>DAG1, TAGLN</i>          | -                                     | <i>TPM2, WASF3</i>   | <i>PDLIM5</i>             |

**Supplementary Figure S1.** Characterization of cell surface markers on iMSCs and UCB-MSCs. Flow cytometric analysis of positive MSC markers (CD73, CD105, and CD90) and negative markers (CD34 and CD45) was performed in monolayer-cultured iMSCs and UCB-MSCs. The data are means  $\pm$  SDs of three independent experiments.

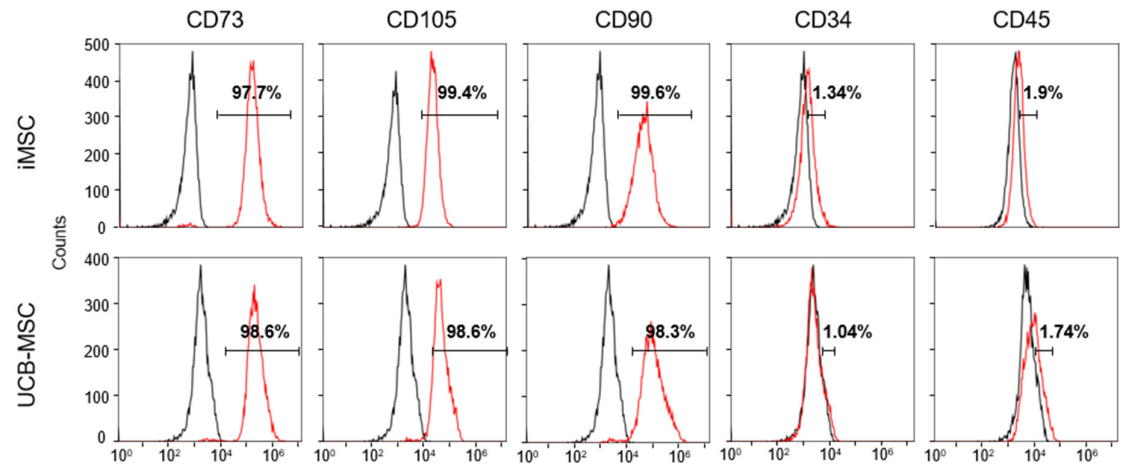

**Supplementary Figure S2.** The top five KEGG pathways of upregulated and downregulated DEGs. KEGG pathway analysis was performed by using DAVID. The x-axis indicates the enrichment scores [ $-\log_{10}$  (p value), p-value cut-off of 0.05] for each KEGG pathway term. The y-axis shows detailed classification of the KEGG pathway terms.

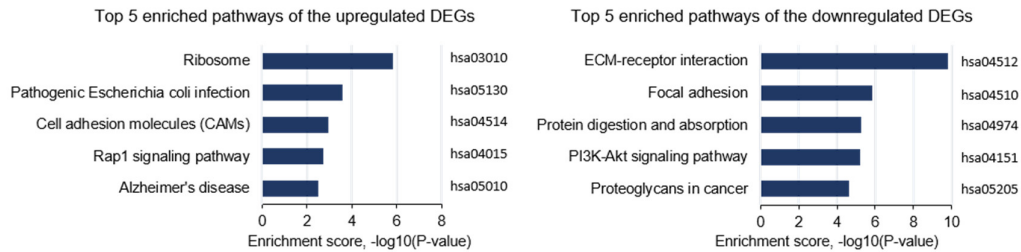

**Supplementary Figure S3.** Sashimi plots of the RNA-seq data for the three types of AS events (A5SS, A3SS, and MXE) that were differentially presented in iMSCs and UCB-MSCs. The sashimi plot was constructed with the MISO package. The vertical axis on the left side of the main panel shows the counts of RNA-Seq reads spanning the junctions in each region. The genomic coordinates for individual splice sites are shown at the top, and the schematic of each splicing event is shown at the bottom. Red indicates iMSCs (C\_MSC-1), and orange indicates UCB-MSCs (C\_MSC-3). A5SS, alternative 5' splice site; A3SS, alternative 3' splice site; MXE, mutually exclusive exon.

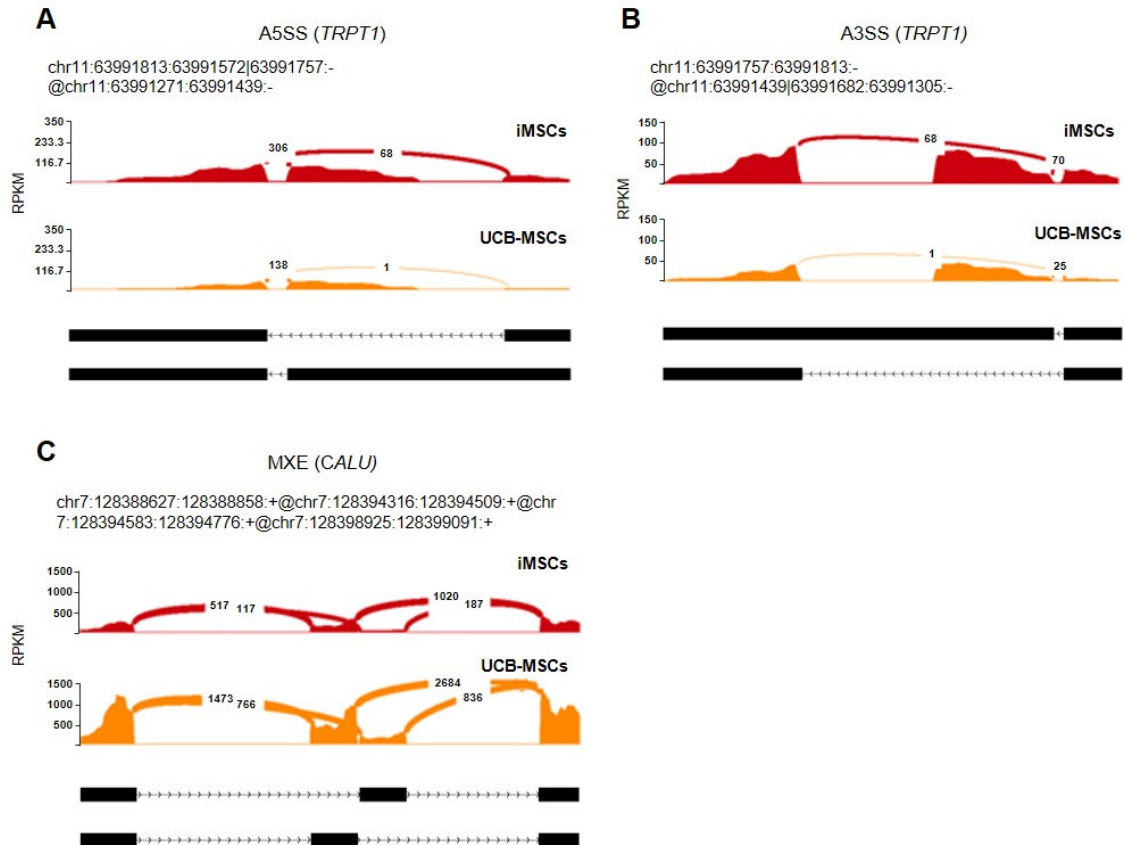

Supplement: s1 [file s1]
